# Supplementary material for: Epidemiology and Cytokine Levels among Children with Nosocomial Multidrug-Resistant Acinetobacter baumannii Complex in a Tertiary Hospital of Eastern China
Source: PLoS One. 2016 Aug 31;11(8):e0161690. doi: 10.1371/journal.pone.0161690 (PMC5007015; doi:10.1371/journal.pone.0161690)
Supplement: S1 Data — (XLSX) [file pone.0161690.s001.xlsx]

## Sheet: Non-MDR-ABC basic date
Gender	Age	Ward	Specimen type	Ciprofloxacin	Levofloxacin	Meropenem	Imipenem	Tobramycin	Gentamycin	Amikacin	Ceftazidime	Cefotaxime	Ceftriaxone	Cefepime	Piperacillin / tazobactam	SXT	Tigecycline
m	<18Y	Other wards	respiratory tract	S	S		S	S	S	S	S		I		S	S
m	<18Y	Other wards	respiratory tract	S	S		S	S	S	S	S		S		S	S
f	<18Y	Other wards	others		S	R	R		I	R	I	I			S
f	≤6M	Other wards	others		S	S	I		S	S	S	S			S
m	≤6M	SICU	respiratory tract		S	S	I		S	S	I	I			R
m	≤6M	NICU	respiratory tract		S	S	I		S	S	S	S			S
m	≤6M	Other wards	respiratory tract		S	S	R		S	S	R	I			S
m	≤6M	NICU	respiratory tract		S	S	I		S	S	I	I			S
m	≤6M	SICU	respiratory tract		S	S	I		S	S	S	I			S
m	≤6M	Other wards	respiratory tract		S	S	I		S	S	S	I			S
m	≤6M	PCIU	respiratory tract		S	S	R		R	R	S	S			S
m	<18Y	Other wards	respiratory tract		S	S	I		S	S	S	I			S
m	≤6M	Other wards	respiratory tract		S	S	I		S	S	S	I			S
m	≤6M	SICU	respiratory tract		S	S	I		S	S	S	S			S
m	<18Y	SICU	others		S	R	R		S	S	I	R			I
m	≤1Y	Other wards	respiratory tract		S	S	I		S	S	S	I			S
m	≤6M	NICU	respiratory tract		S	S	I		S	S	S	I			S
m	≤6M	Other wards	respiratory tract		S	S	I		R	R	R	S			S
f	≤6M	NICU	respiratory tract		S	R	R		R	R	R	I			I
m	<18Y	Other wards	others	S	S		S	S	S	S	S		I	S	S	S
f	≤1Y	SICU	others		S	S	I		S	S	I	I			S
m	≤1Y	Other wards	respiratory tract		S	R	R		S	S	R	S			I
m	≤6M	NICU	respiratory tract		S	S	I		S	S	S	I			S
f	≤6M	PCIU	respiratory tract		S	S	I		I	S	I	S			S
m	≤1Y	Other wards	respiratory tract		S	S	I		S	S	S	S			S
m	≤6M	NICU	respiratory tract		S	S	I		S	S	S	I			S
m	≤6M	Other wards	respiratory tract		S	S	I		S	S	S	S			S
m	≤6M	NICU	respiratory tract		S	S	I		S	S	I	I			S
m	≤6M	NICU	respiratory tract		S	S	I		S	S	S	S			S
m	≤6M	Other wards	respiratory tract		S	R	R		S	S	R	R			S
f	≤6M	SICU	respiratory tract		S	S	I		S	S	S	I			S
f	≤6M	Other wards	respiratory tract		S	S	I		S	S	S	S			S
f	<18Y	Other wards	respiratory tract		S	S	I		S	S	S	S			S
f	<18Y	Other wards	others	S	S		S	S	S	S	S		I	S	S	R
f	≤1Y	Other wards	respiratory tract		S	S	I		S	S	I	I			S
m	≤6M	NICU	respiratory tract		S	S	I		S	S	S	I			S
f	≤6M	SICU	respiratory tract	S	S		S	S	S	S	S		I		S	S
f	<18Y	Other wards	respiratory tract	S	S		S	S	S	S	S		I		S	S
m	≤6M	SICU	respiratory tract	S	S		I	S	S	S	R		R		I	S
f	≤6M	NICU	respiratory tract	S	S		S	S	S	S	S		I		S	R
m	≤6M	Nenoatal ward	respiratory tract	S	S		S	S	S	S	S		I		S	S
m	≤6M	Other wards	respiratory tract	R	S		S	S	S	S	R		R		I	R
m	<18Y	PCIU	respiratory tract	S	S		S	S	S	S	S		I		S	S
f	≤6M	NICU	respiratory tract	S	S		S	S	S	S	S		I		S	S
f	<18Y	PCIU	respiratory tract	S	S		S	R	R	S	I		R		S	R
m	<18Y	Other wards	respiratory tract	S	S		S	S	S	S	S		I		S	S
m	≤6M	Other wards	others	S	S		S	S	S	S	S		R		S	S
f	<18Y	Other wards	respiratory tract	S	S		S	S	S	S	S		I		S	S
f	<18Y	Other wards	others	S	S		S	S	S	S	S		I		S	S
m	≤1Y	SICU	others	S	S		S	S	S	S	S		R		S	S
f	<18Y	Other wards	respiratory tract	S	S		S	S	S	S	S		I		S	S
m	≤6M	Nenoatal ward	respiratory tract	S	S		S	S	S	S	S		I		S	S
f	<18Y	Other wards	respiratory tract	S	S		S	S	S	S	S		I		S	S
m	<18Y	Other wards	respiratory tract	S	S		S	S	S	S	S		S	S	S	S
m	≤1Y	PCIU	respiratory tract	S	S		R	S	R	S	R		R	R	I	S
f	<18Y	Other wards	respiratory tract	S	S		S	S	S	S	S		I	S	S	S
m	≤6M	NICU	respiratory tract	S	S		S	S	S	S	S		I	S	S	S
m	<18Y	Other wards	respiratory tract	S	S		S	S	S	S	S		S	S	S	S
m	<18Y	PCIU	respiratory tract	S	S		S	S	S	S	S		S	S	S	S
f	<18Y	PCIU	respiratory tract	S	S		R	S	R	S	R		R	R	I	S
m	≤6M	NICU	respiratory tract	S	S		S	S	S	S	S		I	S	S	S
m	≤6M	Nenoatal ward	respiratory tract	S	S		S	S	S	S	I		I	S	S	S
m	≤6M	Nenoatal ward	respiratory tract	S	S		S	S	S	S	S		I	S	S	S
f	<18Y	Other wards	respiratory tract	S	S		S	S	S	S	S		I	S	S	S
m	≤1Y	Other wards	respiratory tract	S	S		S	S	S	S	S		I	S	S	S
m	≤6M	NICU	respiratory tract	S	S		S	S	S	S	I		R	I	S	S
m	≤6M	NICU	respiratory tract	S	S		S	S	S	S	S		I	S	S	S
m	<18Y	PCIU	respiratory tract	R	R		R	R	R	R	R		R	R	R	R
m	≤6M	NICU	respiratory tract	S	S		S	S	S	S	S		I	S	S	R
m	<18Y	Other wards	respiratory tract	S	S		S	S	S	S	S		I	S	S	S
m	≤6M	Nenoatal ward	respiratory tract	S	S		S	S	S	S	S		I	S	S	S
m	<18Y	Other wards	respiratory tract	S	S		S	S	S	S	S		I	S	S	S
m	<18Y	Other wards	respiratory tract	S	S		S	S	S	S	S		S	S	S	S
f	<18Y	Other wards	others	S	S		S	S	S	S	S		S	S	S	S
m	<18Y	SICU	respiratory tract	S	S		S	S	S	S	S		I	S	S	S
m	≤6M	SICU	respiratory tract	S	S		S	S	S	S	I		R	R	I	S
m	≤6M	NICU	respiratory tract	S	S		S	S	S	S	I		R	I	S	S
f	<18Y	SICU	respiratory tract	S	S		S	S	S	S	I		R	I	S	S
m	≤6M	NICU	respiratory tract	S	S		S	S	S	S	S		S	S	S	S
m	≤6M	NICU	respiratory tract	S	S		S	S	S	S	S		I	S	S	S
f	≤1Y	Other wards	respiratory tract	S	S		S	S	S	S	S		I	S	S	S
m	<18Y	Other wards	respiratory tract	S	S		S	S	S	S	S		S	S	S	S
m	<18Y	Other wards	respiratory tract	S	S		S	S	S	S	S		I	S	S	S
f	<18Y	SICU	others	S	S		S	S	S	S	S		I	S	S	S
m	≤6M	NICU	respiratory tract	S	S		S	S	S	S	I		I	S	S	S
m	<18Y	PCIU	respiratory tract	S	S		S	S	S	S	I		I	I	S	S
f	<18Y	Other wards	respiratory tract	S	S		S	S	S	S	I		I	S	S	S
m	<18Y	Other wards	respiratory tract	S	S		S	S	S	S	S		I	S	S	S
m	<18Y	SICU	respiratory tract	S	S		S	S	S	S	S		I	S	S	S
m	<18Y	Other wards	respiratory tract	S	S		S	S	S	S	S		S	S	S	S
f	<18Y	PCIU	respiratory tract	S	S		S	S	I	S	S		I	S	S	S
f	≤1Y	SICU	others	S	S		S	S	S	S	S		R	S	S	S
f	≤6M	NICU	respiratory tract	S	S		S	S	S	S	S		S	S	S	S
f	≤6M	Other wards	respiratory tract	S	S		S	S	S	S	S		I	S	S	R
f	<18Y	PCIU	respiratory tract	S	S		R	S	S	S	S		I	S	I	S
m	<18Y	SICU	respiratory tract	S	S		S	S	S	S	S		I	S	S	S
m	≤1Y	PCIU	respiratory tract	S	S		S	S	S		S		I	S	S	S
m	<18Y	Other wards	others	S	S		S	S	S		S		I	S	S	S
m	≤6M	NICU	respiratory tract	S	S		S	S	S	S	I		I	S	S	S
m	≤6M	Nenoatal ward	others	S	S		S	S	S	S	I		I	S	S	S
f	≤6M	NICU	respiratory tract	S	S		S	S	S	S	S		I	S	S	S
m	≤6M	Other wards	respiratory tract	S	S		S	S	S		S		I	S	S	S
m	<18Y	Other wards	respiratory tract	S	S		S	S	S		S		I	S	S	S
m	≤6M	PCIU	respiratory tract	S	S		S	S	S		S		I	S	S	S
m	<18Y	PCIU	others	S	S		S	R	R		R		R	R	S	R
f	≤6M	PCIU	respiratory tract	S	S		S	S	S		S		I	S	S	S
m	≤6M	NICU	respiratory tract	S	S		S	S	S		I		I	S	S	S
m	<18Y	SICU	respiratory tract	S	S		S	S	S		I		I	S	S	S
f	≤6M	SICU	respiratory tract	S	S		S	S	S		S		S	S	S	S
f	<18Y	SICU	others	S	S		S	S	S		I		I	S	S	S
m	≤6M	NICU	respiratory tract	S	S		S	S	S		S		I	S	S	S
m	≤6M	Other wards	respiratory tract	S	S		S	S	S		S		I	S	S	R
m	≤1Y	Other wards	respiratory tract	S	S		S	S	S		S		I	S	S	S
m	≤6M	NICU	respiratory tract	S	S		S	S	S		I		R	R	S	S
m	<18Y	PCIU	others	S	S		S	S	S				I	S	S	S	S
m	≤6M	Other wards	respiratory tract	S	S		S	S	S				I	S	S	S	S
f	≤6M	SICU	respiratory tract	S	S		S	S	S		I		I	S	S	S
m	≤6M	NICU	respiratory tract	S	S		S	S	S		S		I	S	S	S
m	≤6M	SICU	respiratory tract	S	S		S	S	S		S		I	S	S	S
m	≤6M	NICU	respiratory tract	S	S		S	S	S		I		R	S	S	S
m	≤1Y	SICU	respiratory tract	S	S		S	S	S				I	S	S	S	S
m	<18Y	PCIU	respiratory tract	S	S		S	S	S		S		I	S	S	S
m	≤1Y	Other wards	respiratory tract	S	S		S	S	S				I	S	S	S	S
m	≤6M	NICU	respiratory tract	S	S		S	S	S		S		S	S	S	S
m	≤1Y	SICU	respiratory tract	S	S		S	S	S		S		S	S	S	S
f	≤6M	NICU	respiratory tract	S	S		S	S	S		S		I	S	S	S
m	≤6M	NICU	respiratory tract	S	S		S	S	S				R	S	S	S	S
m	≤6M	NICU	respiratory tract	S	S		S	S	S				R	S	S	S	S
m	≤6M	Other wards	respiratory tract	S	S		S	S	S				I	S	S	S	S
f	≤6M	SICU	respiratory tract	S	S		R	S	S				R	R	R	R	S
m	≤6M	Other wards	respiratory tract	S	S		S	S	S				I	S	S	S	S
m	≤6M	Other wards	respiratory tract	S	S		S	S	S				I	S	S	S	S
f	<18Y	Other wards	others	S	S		S	S	S				R	S	S	S	S
m	<18Y	Other wards	others	S	S		R	S	S				R	R	R	R	S
m	<18Y	Other wards	respiratory tract	S	S		S	S	S				S	S	S	S	S
m	<18Y	SICU	respiratory tract	S	S		S	S	S				I	S	S	S	S
m	≤6M	Other wards	respiratory tract	S	S		S	S	S				I	S	S	S	S
f	≤6M	PCIU	respiratory tract	S	S		S	S	S				I	S	S	S	S
m	≤6M	Other wards	respiratory tract	S	S		S	S	S				I	S	S	S	S
m	≤6M	Other wards	respiratory tract	S	S		S	S	S				I	S	S	S	S
f	≤6M	SICU	respiratory tract	S	S		S	S	S				I	S	S	S	S
m	<18Y	PCIU	respiratory tract	S	S		S	S	S				I	S	S	S	S
f	<18Y	Other wards	respiratory tract	S	S		S	S	S				S	S	S	S	S
f	≤6M	Other wards	respiratory tract	S	S		S	S	S				I	S	S	S	S
f	≤6M	Other wards	respiratory tract	S	S		S	S	S				I	S	S	S	S
m	≤6M	Other wards	respiratory tract	S	S		S	S	S				I	S	S	S	S
m	≤6M	Other wards	respiratory tract	S	S		S	S	S				I	S	S	S	S
f	≤1Y	PCIU	respiratory tract	S	S		S	S	S				R	S	S	S	S
f	≤6M	NICU	respiratory tract	S	S		S	S	S				I	S	S	S	S
m	≤6M	Other wards	respiratory tract	S	S		S	S	S				I	S	S	S	S
m	≤6M	SICU	respiratory tract	S	S		S	S	S				I	S	S	S	S
f	≤6M	Other wards	respiratory tract	S	S		S	S	S				I	S	S	S	S
m	≤1Y	Other wards	others	S	S		S	S	S				I	S	S	S	S
m	<18Y	PCIU	respiratory tract	S	S		S	S	S				I	S	S	S	S
m	≤6M	Other wards	respiratory tract	S	S		S	S	S				I	S	S	S	S
f	≤6M	NICU	respiratory tract	S	S		S	S	S				S	S	S	S	S
m	≤6M	NICU	respiratory tract	S	S		S	S	S				I	S	S	S	S
m	≤6M	Other wards	respiratory tract	S	S		S	S	S				I	S	S	S	S
m	≤6M	Other wards	others	S	S		S	S	S				I	S	S	S	S
f	≤6M	NICU	respiratory tract	S	S		S	S	S				I	S	S	S	S
m	≤6M	NICU	respiratory tract	S	S		S	S	S				I	S	S	S	S
f	≤6M	Nenoatal ward	respiratory tract	S	S		S	S	S				I	S	S	S	S
f	≤6M	NICU	respiratory tract	S	S		S	S	S				I	S	S	S	S
m	≤6M	NICU	respiratory tract	S	S		S	S	S				I	S	S	S	S
m	≤6M	Other wards	respiratory tract	S	S		S	S	S				I	S	S	S	S
f	≤6M	Nenoatal ward	respiratory tract	S	S		S	S	S				I	S	S	S	S
m	<18Y	Other wards	others	S	S		S	S	S				I	S	S	S	S
f	≤6M	NICU	respiratory tract	S	S		S	S	S				S	R	S	S	S
m	≤6M	SICU	respiratory tract	S	S		S	S	S				I	S	S	S	S
m	≤6M	NICU	respiratory tract	S	S		S	S	S				I	S	S	S	S
m	≤1Y	Other wards	respiratory tract	S	S		S	S	S				I	S	S	S	S
m	<18Y	PCIU	respiratory tract	S	S		S	S	S				I	I	S	S	S
m	≤6M	SICU	respiratory tract	S	S		S	S	S				I	S	S	S	S
f	≤6M	SICU	respiratory tract	S	S		S	S	S				I	S	S	S	S
f	<18Y	SICU	others	S	S		S	S	S				I	S	S	S	S
m	<18Y	PCIU	respiratory tract	S	S		R	S	S				R	R	R	S	S
m	≤6M	Other wards	respiratory tract	S	S		S	S	S				I	S	S	S	S

## Sheet: MDR-ABC basic date
Gender	Age	Ward	Specimen type	Ciprofloxacin	Levofloxacin	Meropenem	Imipenem	Tobramycin	Gentamycin	Amikacin	Ceftazidime	Cefotaxime	Ceftriaxone	Cefepime	Piperacillin / tazobactam	SXT	Tigecycline
m	<18Y	PICU	respiratory tract		I	R	R		R	R	R	R			R
m	≤6M	SICU	respiratory tract		I	R	R		R	R	R	R			R
f	≤6M	SICU	respiratory tract		R	R	R		R	R	R	R			R
m	≤1Y	PICU	respiratory tract		R	R	R		R	R	R	R			R
f	<18Y	Other wards	respiratory tract		R	R	R		R	R	R	R			R
m	<18Y	PICU	respiratory tract		I	R	R		R	R	R	I			R
m	≤6M	PICU	respiratory tract		R	R	R		R	R	R	R			R
m	<18Y	PICU	respiratory tract		R	R	R		R	I	R	R			R
m	<18Y	PICU	respiratory tract		R	R	R		R	R	R	R			R
m	<18Y	PICU	respiratory tract		I	R	R		R	R	R	R			R
m	≤6M	SICU	respiratory tract		R	R	R		R	R	R	R			R
f	≤6M	SICU	respiratory tract		R	R	R		R	R	R	R			R
f	≤6M	Other wards	others		R	R	R		R	R	R	R			R
m	≤1Y	PICU	respiratory tract		I	R	R		R	R	R	I			R
f	<18Y	SICU	others		R	R	R		R	R	R	R			R
m	≤1Y	PICU	respiratory tract		R	R	R		R	R	R	R			R
m	<18Y	Other wards	others		R	R	R		R	I	R	R			R
m	<18Y	Other wards	respiratory tract		R	R	R		R	R	R	R			R
m	<18Y	Other wards	respiratory tract		R	R	R		R	R	R	R			R
f	<18Y	PICU	respiratory tract		R	R	R		R	R	R	I			I
m	<18Y	SICU	respiratory tract		R	R	R		R	R	R	R			R
f	≤1Y	SICU	respiratory tract		R	R	R		S	I	R	I			I
f	<18Y	PICU	respiratory tract		R	R	R		R	R	R	I			R
f	≤6M	SICU	respiratory tract		R	R	R		R	R	R	R			R
m	<18Y	SICU	others		R	R	R		R	R	R	R			R
f	<18Y	NICU	respiratory tract	R	R		R	S	R	S	R		R		R	R
m	≤6M	NICU	respiratory tract	R	R		R	S	R	S	R		R		R	R
m	≤6M	NICU	respiratory tract	R	R		R	S	R	S	R		R		R	R
m	≤6M	NICU	respiratory tract	R	R		R	S	R	S	R		R		R	R
m	<18Y	Other wards	others	R	R		R	S	S	S	R		R		R	R
m	<18Y	SICU	respiratory tract	R	R		R	S	R	S	R		R		R	R
f	≤6M	NICU	others	R	R		R	S	S	S	R		R		R	S
m	<18Y	Other wards	others	R	R		R	S	S	S	R		R		R	R
m	≤6M	NICU	respiratory tract	R	R		R	S	R	S	R		R		R	R
m	<18Y	NICU	respiratory tract	R	R		R	S	R	S	R		R	R	R	R
m	≤6M	NICU	respiratory tract	R	R		R	R	R	S	R		R	R	R	R
f	≤6M	NICU	respiratory tract	R	R		R	S	R	S	R		R		R	R
m	≤6M	NICU	respiratory tract	R	R		R	S	R	S	R		R	R	R	R
f	<18Y	NICU	respiratory tract	R	R		R	S	R	S	R		R		R	R
m	<18Y	NICU	respiratory tract	R	R		R	S	R	S	R		R	R	R	R
f	≤6M	NICU	respiratory tract	R	R		R	S	R	S	R		R	R	R	R
m	≤6M	Nenoatal ward	respiratory tract	R	R		R	S	R	S	R		R	R	R	R
m	<18Y	SICU	others	R	R		R	R	R	S	R		R	R	R	R
m	≤6M	NICU	respiratory tract	R	R		R	S	S	S	R		R	R	R	S
f	≤6M	NICU	respiratory tract	R	R		R	S	R	S	R		R	R	R	R
f	≤6M	NICU	respiratory tract	R	R		R	S	S	S	R		R	R	R	S
f	<18Y	PICU	respiratory tract	R	R		R	R	R	S	R		R	R	R	R
m	<18Y	NICU	respiratory tract	R	R		R	R	R	S	R		R	R	R	R
f	<18Y	SICU	respiratory tract	R	R		R	S	R	S	R		R	R	R	R
f	<18Y	NICU	respiratory tract	R	R		R	R	R	S	R		R	R	R	R
m	≤6M	NICU	respiratory tract	R	R		R	R	R	S	R		R	R	R	R
f	<18Y	PICU	respiratory tract	R	R		R	S	R	S	R		R	R	R	R
m	<18Y	PICU	respiratory tract	R	R		R	R	R	S	R		R	R	R	R
m	≤6M	NICU	respiratory tract	R	R		R	R	R	S	R		R	R	R	R
f	<18Y	SICU	respiratory tract	R	R		R	R	R	S	R		R	R	R	R
m	≤6M	NICU	respiratory tract	R	R		R	S	R	S	R		R	R	R	R
m	<18Y	Other wards	respiratory tract	S	S		R	S	S	S	R		R	R	R	R
m	≤6M	Nenoatal ward	respiratory tract	R	R		R	S	R	S	R		R	R	R	R
f	≤6M	NICU	respiratory tract	R	R		R	R	R	S	R		R	R	R	R
f	≤6M	NICU	respiratory tract	R	R		R	R	R	S	R		R	R	R	R
m	≤6M	NICU	respiratory tract	R	R		R	R	R	R	R		R	R	R	R
f	<18Y	Other wards	respiratory tract	S	S		R	S	S				R	R	I	R	S
f	<18Y	Other wards	respiratory tract	R	R		R	R	R	S	R		R	R	R	R
f	<18Y	SICU	respiratory tract	R	R		R	S	R	S	R		R	R	R	R
m	<18Y	PICU	respiratory tract	R	R		R	R	R	S	R		R	R	R	R
f	<18Y	SICU	respiratory tract	R	I		R	S	S	S	R		R	R	R	S
m	≤6M	SICU	respiratory tract	R	R		R	S	S	S	R		R	R	R	S
m	≤6M	Nenoatal ward	others	R	R		R	S	R	S	R		R	R	R	R
m	≤6M	NICU	respiratory tract	R	R		R	R	R	S	R		R	R	R	R
m	<18Y	SICU	respiratory tract	R	R		R	S	S	S	R		R	R	R	S
m	<18Y	SICU	respiratory tract	R	I		R	S	S	S	R		R	R	R	S
m	<18Y	Other wards	others	S	S		R	S	S				R	R	R	R	S
m	<18Y	SICU	respiratory tract	R	R		R	R	R	S	R		R	R	R	R
m	<18Y	SICU	respiratory tract	R	R		R	R	R	S	R		R	R	R	R
f	≤6M	NICU	respiratory tract	R	R		R	S	R	S	R		R	R	R	S
m	<18Y	PICU	respiratory tract	R	R		R	R	R	R	R		R	R	R	R
m	<18Y	Other wards	others	R	R		R	R	R	S	R		R	R	R	R
f	≤6M	Nenoatal ward	respiratory tract	R	R		R	S	R	S	R		R	R	R	S
f	<18Y	SICU	respiratory tract	R	R		R	S	R	S	R		R	R	R	S
m	<18Y	SICU	respiratory tract	R	R		R	S	R	S	R		R	R	R	R
m	<18Y	PICU	respiratory tract	R	R		R	R	R	S	R		R	R	R	R
m	≤6M	Nenoatal ward	respiratory tract	R	R		R	S	R	S	R		R	R	R	S
m	<18Y	Other wards	others	R	R		R	R	R	S	R		R	R	R	R
f	<18Y	NICU	respiratory tract	R	R		R	S	S	S	R		R	R	R	S
m	<18Y	Other wards	others	R	R		R	R	R	S	R		R	R	R	R
f	<18Y	SICU	respiratory tract	R	R		R	S	R	S	R		R	R	R	S
m	<18Y	PICU	respiratory tract	R	R		R	R	R	S	R		R	R	R	R
f	<18Y	PICU	respiratory tract	R	R		R	R	R	S	R		R	R	R	R
m	≤6M	NICU	respiratory tract	R	R		R	S	S	S	R		R	R	R	S
m	<18Y	PICU	respiratory tract	R	R		R	R	R	S	R		R	R	R	R
f	<18Y	PICU	respiratory tract	R	R		R	R	R	S	R		R	R	R	R
m	<18Y	SICU	respiratory tract	R	I		R	S	S	S	R		R	R	R	S
m	≤6M	NICU	respiratory tract	R	R		R	S	S	S	R		R	R	R	S
m	<18Y	SICU	respiratory tract	R	R		R	R	R	S	R		R	R	R	R
m	<18Y	Other wards	others	R	R		R	R	R	S	R		R	R	R	R
f	<18Y	SICU	respiratory tract	R	R		R	R	R	S	R		R	R	I	R
m	<18Y	SICU	respiratory tract	R	R		R	R	R	S	R		R	R	R	R
m	<18Y	SICU	respiratory tract	R	R		R	S	R	S	R		R	R	R	S
m	<18Y	NICU	respiratory tract	R	R		R	S	R	S	R		R	R	R	S
m	<18Y	Other wards	others	R	R		R	S	S	S	R		R	R	R	R
f	≤6M	SICU	respiratory tract	R	R		R	R	R	S	R		R	R	R	R
m	≤6M	Nenoatal ward	respiratory tract	R	R		R	S	R	S	R		R	R	R	S
m	≤6M	NICU	respiratory tract	R	R		R	S	S	S	R		R	R	R	S
f	≤6M	SICU	respiratory tract	R	R		R	R	R	S	R		R	R	R	R
m	≤6M	NICU	respiratory tract	R	R		R	S	R	S	R		R	R	R	R
m	≤6M	SICU	respiratory tract	R	R		R	R	R	R	R		R	R	R	R
m	≤6M	SICU	respiratory tract	R	R		R	R	R	R	R		R	R	R	R
m	≤6M	NICU	respiratory tract	R	R		R	S	R		R		R	R	R	S
f	≤6M	PICU	respiratory tract	R	R		R	S	I	S	R		R	R	R	S
m	≤1Y	SICU	respiratory tract	R	R		R	R	R	S	R		R	R	R	R
f	<18Y	Other wards	respiratory tract	R	R		R	R	R				R	R	R	R	I
f	≤1Y	SICU	respiratory tract	R	R		R	R	R	S	R		R	R	R	R
f	≤1Y	SICU	respiratory tract	R	R		R	R	R	R	R		R	R	R	R
f	≤6M	SICU	respiratory tract	R	R		R	R	R	S	R		R	R	R	R
m	≤6M	SICU	respiratory tract	R	R		R	R	R	R	R		R	R	R	R
f	≤6M	SICU	respiratory tract	R	R		R	R	R		R		R	R	R	R
m	<18Y	SICU	respiratory tract	R	R		R	R	R	R	R		R	R	R	R
f	≤6M	SICU	respiratory tract	R	R		R	R	R		R		R	R	R	R
f	≤6M	NICU	respiratory tract	R	R		R	R	R	S	R		R	R	R	R
f	≤1Y	SICU	respiratory tract	R	R		R	R	R	S	R		R	R	R	R
f	≤6M	NICU	respiratory tract	R	R		R	S	R		R		R	R	R	S
f	≤6M	Other wards	others	R	R		R	R	R		R		R	R	I	R
m	≤6M	SICU	respiratory tract	R	R		R	S	S		R		R	R	R	R
f	≤6M	NICU	respiratory tract	R	R		R	S	S		R		R	R	R	R
m	≤1Y	PICU	respiratory tract	I	S		R	R	R	R	R		R	R	I	S
m	≤1Y	SICU	respiratory tract	R	R		R	R	R		R		R	R	R	R
m	<18Y	SICU	respiratory tract	R	R		R	R	R				R	R	R	R	I
f	<18Y	SICU	respiratory tract	R	R		R	R	R				R	R	R	R	S
m	≤6M	NICU	respiratory tract	R	R		R	S	R		R		R	R	R	S
m	≤6M	NICU	respiratory tract	R	R		R	S	R		R		R	R	R	S
f	≤6M	SICU	respiratory tract	R	R		R	R	R		R		R	R	R	R
m	<18Y	PICU	respiratory tract	R	R		R	R	R		R		R	R	R	R
f	≤6M	NICU	respiratory tract	R	R		R	S	R		R		R	R	R	S
m	≤6M	SICU	respiratory tract	R	R		R	R	I		R		R	R	R	R
m	<18Y	SICU	respiratory tract	R	I		R	R	R		R		R	R	R	S
m	<18Y	SICU	respiratory tract	R	R		R	R	R				R	R	R	R	S
f	≤1Y	SICU	others	R	R		R	R	R				R	I	I	R	I
f	≤6M	SICU	respiratory tract	R	R		R	R	R				R	R	R	S	R
f	<18Y	Other wards	respiratory tract	S	S		R	S	S				R	R	S	R	S
m	≤6M	SICU	others	R	R		R	R	R				R	R	R	R	S
f	<18Y	Other wards	respiratory tract	R	R		R	R	R				R	R	R	R	S
f	<18Y	PICU	respiratory tract	R	R		R	S	R				R	R	R	R	I
m	<18Y	PICU	respiratory tract	R	R		R	S	R				R	R	R	R	I
f	≤6M	SICU	respiratory tract	R	R		R	R	R				R	R	R	R	S
m	<18Y	PICU	others	S	S		R	R	R				R	R	R	S	S
m	<18Y	PICU	respiratory tract	R	R		R	R	R				R	R	R	R	I
f	≤1Y	SICU	respiratory tract	R	R		R	R	R				R	R	R	R	S
f	≤6M	PICU	respiratory tract	R	R		R	R	R				R	R	R	R	I
m	≤6M	PICU	respiratory tract	R	R		R	S	R				R	R	R	S	I
m	≤6M	PICU	respiratory tract	R	R		R	R	R				R	R	R	R	I
f	<18Y	PICU	respiratory tract	R	R		R	S	R				R	R	R	S	I
m	<18Y	SICU	respiratory tract	R	R		R	S	I				R	R	R	R	R
f	<18Y	Other wards	others	S	S		S	I	I				R	R	S	R	S
m	≤6M	SICU	respiratory tract	R	R		R	R	R				R	R	R	R	I
m	≤1Y	Other wards	respiratory tract	S	S		S	S	S				I	S	S	R	S
f	<18Y	SICU	respiratory tract	R	R		R	R	R				R	R	R	R	I
m	≤6M	Nenoatal ward	respiratory tract	R	R		R	R	R				R	R	R	R	R
m	≤1Y	SICU	respiratory tract	R	R		R	R	R				R	R	R	R	I
m	<18Y	Other wards	others	R	R		R	R	R				R	R	R	R	S
m	≤6M	Other wards	respiratory tract	R	S		S	S	R				R	I	S	R	S
m	≤6M	SICU	respiratory tract	R	R		R	R	R				R	R	R	R	R
f	≤6M	SICU	respiratory tract	R	R		R	R	R				R	R	R	R	R
f	<18Y	SICU	respiratory tract	R	R		R	S	R				R	R	R	R	R
f	<18Y	PICU	respiratory tract	R	R		R	R	R				R	R	R	R	I
m	≤1Y	SICU	respiratory tract	R	R		R	S	S				R	R	R	R	I
f	≤6M	SICU	others	R	R		R	R	R				R	R	R	R	I
f	≤1Y	Other wards	others	R	R		R	R	R				R	R	R	R	I
m	<18Y	PICU	respiratory tract	R	R		R	R	R				R	R	R	R	S
m	<18Y	SICU	respiratory tract	R	R		R	R	R				R	R	R	R	S
m	<18Y	Other wards	respiratory tract	R	R		R	R	R				R	R	R	R	I
m	≤6M	Nenoatal ward	respiratory tract	R	R		R	R	R				R	R	R	R	I
f	<18Y	SICU	respiratory tract	R	R		R	R	R				R	R	R	R	I
f	<18Y	Other wards	others	S	S		R	S	R				S	R	R	R	S
f	<18Y	PICU	respiratory tract	R	R		R	S	R				R	R	R	R	R
m	<18Y	SICU	others	R	R		R	R	R				R	R	R	R	I
m	≤1Y	SICU	others	R	R		R	R	R				R	R	R	R	S
m	<18Y	SICU	respiratory tract	R	R		R	R	R				R	R	R	S	R
f	≤6M	NICU	respiratory tract	R	I		R	R	R				R	R	R	R	S
f	≤6M	Nenoatal ward	respiratory tract	R	R		R	S	R				R	R	R	R	I
m	≤6M	PICU	respiratory tract	S	S		S	S	S				I	S	S	R	S
m	≤6M	NICU	others	R	I		R	R	R				R	R	R	R	S
f	≤6M	NICU	respiratory tract	R	I		R	R	R				R	R	R	R	S
f	≤6M	Nenoatal ward	respiratory tract	R	R		R	R	R				R	R	R	R	S
f	≤6M	Other wards	others	R	R		R	S	R				R	R	R	R	I
m	<18Y	SICU	respiratory tract	R	R		R	R	R				R	R	R	R	S
m	≤6M	SICU	respiratory tract	R	R		R	R	R				R	R	R	S	R
m	≤6M	Nenoatal ward	respiratory tract	R	R		R	S	R				R	R	R	S	I
m	≤1Y	SICU	others	R	R		R	R	R				R	R	R	R	S
f	<18Y	PICU	respiratory tract	R	I		R	R	R				R	R	R	R	S
f	<18Y	SICU	others	R	R		R	R	R				R	R	R	R	S
f	<18Y	PICU	respiratory tract	S	S		R	S	R				I	S	I	S	S
f	<18Y	SICU	others	R	R		R	R	R				R	R	R	R	S
m	<18Y	Other wards	respiratory tract	R	R		R	R	R				R	R	R	S	R
m	≤6M	NICU	respiratory tract	R	R		R	R	R				R	R	R	R	S
m	≤6M	Nenoatal ward	respiratory tract	R	R		R	R	I				R	R	R	R	S
m	≤6M	SICU	respiratory tract	R	R		R	R	R				R	R	R	R	S
m	<18Y	SICU	respiratory tract	R	R		R	R	R				R	R	R	S	I
m	<18Y	SICU	others	R	R		R	R	R				R	R	R	S	R
f	<18Y	Other wards	others	R	R		R	R	R				R	R	R	R	S
f	≤6M	SICU	respiratory tract	R	R		R	R	R				R	R	R	S	R

## Sheet: Risk factor
Non-MDR-ABC
Age	Gender	ICU	SICU	hospital stay(days)	Congenital heart disease	Premature delivery	Tumors	Pneumonia	Previous Hospitalization	Surgical intervention	Mechanical Ventilation required	Outcomes		Age
1	1	1	1	25	0	0	0	0	0	1	0	1		>1Y	1
1	1	1	1	39	0	1	0	1	0	0	0	1		<=1Y	0
1	1	1	1	14	0	0	0	1	0	0	1	1
1	1	1	1	9	0	0	0	1	1	0	0	1		Gender
1	1	1	1	13	0	0	0	1	0	0	0	1		m	1
1	1	1	1	17	0	0	0	0	0	1	0	1		f	0
1	1	1	1	30	1	0	0	1	1	0	0	1
1	1	1	1	41	0	0	0	1	1	1	0	1		ICU
1	1	1	1	12	0	0	0	1	0	0	0	1		ICU	1
1	1	1	1	111	0	1	0	1	0	1	1	0		Non-ICU	0
1	1	1	1	37	0	1	0	1	0	0	1	1
1	1	1	1	15	0	0	0	1	0	0	0	1
1	1	1	1	14	0	0	0	1	1	0	0	1		SICU	1
1	1	1	1	7	0	1	0	0	1	0	1	1		Non-SICU	0
1	1	1	1	25	0	0	0	0	1	1	0	1
1	1	1	1	41	1	0	0	1	0	0	0	1		Outcomes
1	1	1	1	12	0	0	0	1	0	1	0	1		Non-die	1
1	1	1	1	44	0	1	0	1	0	0	0	1		die	0
1	1	1	1	50	1	0	0	1	0	1	0	1
1	1	1	1	35	1	0	0	0	0	1	0	1		Others
1	1	1	1	9	1	0	0	0	0	0	0	1		Yes	1
1	1	1	1	57	1	0	0	1	0	1	1	1		No	2
1	1	1	1	10	0	0	0	1	0	0	0	1
1	1	1	1	34	1	0	0	1	1	1	0	1
1	1	1	1	63	0	1	0	1	0	1	1	1
1	1	1	1	13	0	0	0	1	0	0	0	1
1	1	1	1	10	0	0	1	1	1	0	0	1
1	1	1	1	47	1	0	0	1	0	0	1	1
1	1	1	1	24	1	0	0	0	0	1	1	1
1	1	1	1	21	0	0	0	1	0	0	0	1
1	1	1	1	15	0	0	0	1	0	0	0	1
1	1	1	0	6	0	0	0	1	0	0	0	1
1	1	1	0	6	0	0	0	1	0	0	0	1
1	1	1	0	5	0	0	0	1	0	0	0	1
1	1	1	0	10	1	0	0	1	0	0	0	1
1	1	1	0	69	1	0	0	1	0	0	1	1
1	1	1	0	22	1	0	0	0	0	1	0	1
1	1	1	0	40	0	1	0	1	0	0	0	1
1	1	1	0	5	0	0	0	1	0	0	0	1
1	1	1	0	19	1	0	0	1	0	0	0	1
1	1	1	0	5	0	0	0	1	0	0	0	1
1	1	1	0	51	1	0	0	1	1	1	0	1
1	1	1	0	23	1	0	0	1	0	0	0	1
1	1	1	0	11	0	0	0	1	0	0	1	1
1	1	1	0	20	1	0	0	1	1	0	1	1
1	1	1	0	8	1	0	0	1	0	0	0	1
1	1	1	0	99	0	1	0	1	0	1	1	1
1	1	1	0	26	1	0	0	1	0	0	0	1
1	1	1	0	15	0	0	0	1	0	0	0	1
1	1	1	0	36	0	0	0	1	0	0	0	1
1	1	1	0	14	1	0	0	0	0	1	0	1
1	1	1	0	29	1	0	0	1	0	0	1	1
1	1	1	0	32	1	0	0	1	0	1	0	1
1	1	1	0	35	0	0	0	0	0	1	0	1
1	1	1	0	25	1	0	0	1	0	0	1	1
1	1	1	0	18	1	0	0	1	0	0	0	1
1	1	1	0	14	1	0	0	0	0	1	0	1
1	1	1	0	46	0	1	0	1	0	0	0	1
0	1	1	0	12	0	0	0	1	0	0	0	1
0	1	1	0	29	0	0	1	0	1	0	0	1
0	1	1	0	38	1	0	0	0	0	1	0	1
0	1	1	0	32	0	0	0	1	0	0	1	1
0	1	1	0	9	1	0	0	0	0	1	0	1
0	1	1	0	13	0	0	0	0	0	0	0	1
0	1	1	0	113	0	1	0	1	0	1	1	1
0	1	1	0	55	0	1	0	1	0	0	1	0
0	1	1	0	8	1	0	0	1	1	1	0	1
0	1	1	0	47	0	0	0	0	0	0	0	1
0	1	1	0	31	0	0	0	1	0	0	0	1
0	1	1	0	29	0	0	0	0	0	0	1	1
0	1	1	0	12	0	0	0	0	0	1	1	1
0	1	1	0	79	1	0	0	1	0	1	0	1
0	1	1	0	9	1	0	0	1	1	0	1	1
0	1	1	0	38	0	0	0	0	1	1	0	1
0	1	1	0	6	1	0	0	1	1	0	0	1
0	1	1	0	60	1	0	0	1	0	1	0	1
0	1	1	0	156	1	1	1	1	0	1	0	1
0	1	1	0	78	1	1	0	1	0	0	0	1
0	1	1	0	33	1	0	0	0	0	1	0	1
0	1	1	0	44	1	0	0	1	1	1	0	1
0	1	1	0	51	0	0	0	1	0	1	1	0
0	1	1	0	14	1	0	0	1	0	0	0	1
0	1	1	0	6	0	0	0	0	0	0	0	1
0	1	1	0	18	0	1	0	0	1	1	0	1
0	1	1	0	84	0	1	0	1	0	0	1	1
0	1	1	0	65	0	1	0	1	0	0	1	1
0	1	1	0	33	1	0	0	1	1	1	0	1
0	1	1	0	36	0	0	0	1	0	0	1	1
0	1	1	0	29	1	0	0	1	0	1	0	1
0	1	1	0	7	0	0	0	0	0	0	0	1
0	1	1	0	42	1	0	0	1	0	1	0	1
0	1	1	0	8	1	0	0	1	1	0	0	1
0	1	1	0	57	0	0	0	1	0	1	0	1
0	1	1	0	29	0	0	0	1	0	0	1	0
0	1	1	0	18	0	0	1	1	1	0	0	0
0	1	0	0	14	0	0	0	1	0	0	0	1
0	1	0	0	27	0	0	0	0	1	1	0	1
0	1	0	0	8	0	0	0	0	0	1	0	1
0	1	0	0	43	0	0	0	1	1	0	0	1
0	1	0	0	17	0	0	0	1	0	0	1	1
0	1	0	0	9	0	0	0	1	0	1	1	1
0	1	0	0	66	1	0	0	1	1	0	0	1
0	1	0	0	14	0	0	0	1	0	0	0	1
0	1	0	0	25	1	0	0	1	0	1	0	1
0	1	0	0	43	0	0	0	1	0	0	1	1
0	1	0	0	11	0	0	0	1	0	0	0	1
0	1	0	0	20	0	1	0	1	0	1	1	1
0	1	0	0	60	0	0	0	0	1	0	0	1
0	1	0	0	13	0	1	0	0	0	0	1	1
0	1	0	0	7	0	0	0	1	0	0	0	1
0	1	0	0	8	0	1	0	0	0	0	0	1
0	1	0	0	17	0	1	0	1	0	0	1	1
0	1	0	0	68	0	1	0	0	0	0	1	1
0	1	0	0	6	0	0	0	0	0	1	0	1
0	1	0	0	3	1	0	0	0	0	1	1	0
0	1	0	0	20	0	1	0	0	0	1	1	0
0	1	0	0	6	0	0	0	1	0	0	0	1
0	1	0	0	3	0	0	0	1	0	0	0	1
0	1	0	0	18	1	0	0	0	0	1	1	1
0	1	0	0	16	0	0	0	0	0	0	0	0
0	1	0	0	4	0	0	0	1	0	0	0	1
0	0	0	0	33	0	1	0	1	0	0	1	1
0	0	0	0	38	1	0	0	1	0	0	0	1
0	0	0	0	11	0	0	0	0	1	1	0	1
0	0	0	0	19	0	0	0	1	0	1	0	1
0	0	0	0	5	0	0	0	0	0	0	0	1
0	0	0	0	63	0	1	0	1	0	0	1	1
0	0	0	0	22	1	0	0	0	0	1	0	1
0	0	0	0	122	1	1	0	1	0	0	1	0
0	0	0	0	7	0	0	0	1	1	0	0	1
0	0	0	0	9	0	0	0	0	0	0	1	1
0	0	0	0	39	1	0	0	1	0	1	1	0
0	0	0	0	26	0	0	0	1	0	0	0	1
0	0	0	0	21	0	0	0	1	0	0	1	1
0	0	0	0	10	0	0	1	0	1	0	0	1
0	0	0	0	26	1	0	0	0	1	0	0	1
0	0	0	0	26	1	0	0	0	1	1	0	1
0	0	0	0	10	0	0	0	1	1	0	0	1
0	0	0	0	64	0	0	0	0	0	1	0	1
0	0	0	0	8	0	0	0	1	0	0	0	1
0	0	0	0	10	0	0	1	0	1	0	0	1
0	0	0	0	21	1	0	0	1	0	1	1	0
0	0	0	0	8	0	0	0	1	1	0	0	1
0	0	0	0	26	1	0	0	1	0	1	0	1
0	0	0	0	34	1	1	0	1	0	0	1	1
0	0	0	0	13	0	0	0	1	0	0	0	1
0	0	0	0	21	0	0	0	1	0	0	0	1
0	0	0	0	14	1	0	0	1	1	0	0	1
0	0	0	0	27	0	0	0	1	1	0	0	1
0	0	0	0	41	1	0	0	0	0	1	1	1
0	0	0	0	10	0	0	0	1	0	0	0	1
0	0	0	0	18	0	0	0	1	0	0	0	1
0	0	0	0	27	0	0	0	0	0	1	1	1
0	0	0	0	35	0	0	0	1	1	0	1	0
0	0	0	0	15	1	0	0	0	0	1	0	1
0	0	0	0	61	0	1	0	1	0	0	1	1
0	0	0	0	34	0	0	0	0	0	1	0	1
0	0	0	0	39	1	1	0	0	0	1	1	1
0	0	0	0	26	1	0	0	1	0	1	0	1
0	0	0	0	10	0	0	0	1	0	0	0	1
0	0	0	0	6	0	0	0	1	1	0	0	1
0	0	0	0	206	0	0	0	1	1	0	0	1
0	0	0	0	34	1	0	0	1	0	1	0	1
0	0	0	0	3	0	0	0	1	0	0	0	1
0	0	0	0	3	0	0	0	1	0	0	0	1
0	0	0	0	9	0	0	0	0	0	0	0	1
0	0	0	0	9	0	0	0	0	0	1	1	0
0	0	0	0	7	0	0	0	0	0	0	1	1
0	0	0	0	29	1	0	0	1	0	1	0	1
0	0	0	0	3	0	0	0	0	0	0	1	1
0	0	0	0	6	0	0	0	0	0	0	0	1
0	0	0	0	18	0	1	0	1	0	0	1	1
0	0	0	0	4	0	1	0	0	0	0	0	1
0	0	0	0	4	1	0	0	0	0	1	0	1
0	0	0	0	9	1	0	0	0	0	0	1	1
0	0	0	0	11	1	0	0	1	0	1	0	1
0	0	0	0	13	0	0	0	0	0	1	1	1
MDR-ABC
Age	Gender	ICU	SICU	hospital stay(days)	Congenital heart disease	Premature delivery	Tumors	Pneumonia	Previous Hospitalization	Surgical intervention	Mechanical Ventilation required	Outcomes
1	1	1	1	149	0	0	0	1	0	0	1	1
1	1	1	1	53	1	0	0	1	0	1	1	0
1	1	1	1	50	1	0	0	1	0	1	1	1
0	0	1	0	18	0	0	0	1	1	1	0	1
0	0	1	0	41	0	0	0	1	0	0	1	0
1	1	1	1	26	0	0	0	1	0	0	1	0
1	1	1	1	45	1	0	0	1	0	0	1	1
1	1	1	1	10	0	0	0	1	0	0	0	1
0	0	1	0	6	0	0	0	1	1	0	1	1
0	0	1	0	23	0	0	0	1	1	0	0	1
1	1	1	1	45	1	0	0	1	0	1	0	1
0	0	1	0	49	1	0	0	1	0	1	1	1
0	0	1	0	32	1	0	0	0	0	1	0	1
0	0	1	0	48	0	0	0	1	0	0	1	1
1	1	1	1	78	0	0	0	1	0	1	1	1
0	0	1	0	34	0	0	0	1	0	0	1	0
1	1	1	1	52	0	0	0	0	0	1	0	1
1	1	1	1	30	0	0	0	1	0	0	0	1
1	1	1	1	35	0	0	0	1	1	0	0	1
0	0	1	0	25	0	0	0	1	0	0	1	1
1	1	1	1	105	1	0	0	1	0	1	0	1
1	1	1	1	45	1	0	0	1	0	1	0	1
0	0	1	0	23	0	0	0	1	0	0	1	1
0	0	1	0	26	1	0	0	1	0	1	0	1
1	1	1	1	40	0	0	1	0	0	0	0	1
1	1	1	1	57	0	1	0	1	0	0	1	1
1	1	1	1	12	1	0	0	1	0	0	1	1
0	0	1	0	7	1	1	0	0	0	0	1	1
0	0	1	0	22	0	0	0	1	0	0	1	1
0	0	1	0	44	0	0	0	0	0	1	0	1
1	1	1	1	52	1	0	0	1	0	1	1	1
0	0	1	0	24	1	0	0	1	0	1	1	1
0	0	1	0	40	0	0	1	0	0	1	1	0
0	0	1	0	84	0	1	0	1	0	0	1	1
0	0	1	0	49	1	0	0	1	0	1	0	1
1	1	1	1	27	0	1	0	0	0	0	1	1
1	1	1	1	15	0	0	0	0	0	0	0	1
1	1	1	1	31	1	0	0	1	0	1	0	1
1	1	1	1	12	0	0	0	0	0	0	1	1
0	0	1	0	21	0	1	0	1	0	1	0	0
0	0	1	0	34	1	1	0	1	0	0	0	1
1	1	1	1	27	0	0	0	0	0	0	0	1
1	1	1	1	78	0	0	0	0	0	1	0	1
0	0	1	0	43	1	1	0	1	0	0	0	1
1	1	1	1	8	0	0	0	0	0	0	1	1
1	1	1	1	17	0	0	0	0	0	0	1	1
1	1	1	1	75	1	0	0	1	0	1	1	1
0	0	1	0	59	0	0	0	1	0	0	1	0
1	1	1	1	81	1	0	0	0	0	1	0	1
1	1	1	1	63	1	0	0	1	0	1	1	0
1	1	1	1	54	0	1	0	0	0	1	0	1
0	0	1	0	40	1	0	0	1	0	0	0	1
1	1	1	1	16	0	0	0	1	0	0	0	1
1	1	1	1	15	0	0	0	1	0	0	1	1
0	0	1	0	85	0	1	0	1	0	1	0	1
1	1	1	1	41	1	0	0	1	0	1	0	1
0	0	1	0	14	0	0	0	1	0	1	1	1
1	1	1	1	55	0	0	1	1	1	0	0	1
0	0	1	0	16	0	0	0	1	1	0	0	1
1	1	1	1	69	0	1	0	1	0	0	1	1
1	1	1	1	113	1	1	0	1	0	1	1	1
0	0	1	0	72	0	1	0	1	1	1	1	1
0	0	0	0	74	0	0	1	0	1	0	1	1
0	0	1	0	80	1	0	0	1	0	1	1	1
1	1	1	1	47	1	0	0	1	0	1	1	1
1	1	1	1	55	0	0	0	1	0	1	1	1
0	0	1	0	149	1	0	0	1	1	1	1	0
0	0	1	0	39	1	1	0	1	0	1	1	0
0	0	1	0	11	1	0	0	0	0	1	0	1
0	0	1	0	18	0	0	0	1	0	0	1	0
1	1	1	1	88	1	0	0	1	1	1	1	1
1	1	1	1	32	1	0	0	0	0	1	0	1
0	0	0	0	282	0	0	1	0	1	0	0	0
1	1	1	1	36	0	0	0	0	0	1	1	1
0	0	1	0	52	1	0	0	1	0	1	1	1
0	0	1	0	19	0	1	0	1	0	0	1	1
1	1	1	1	21	0	0	0	1	0	0	0	1
1	1	1	1	39	0	0	0	0	0	1	0	1
1	1	1	1	18	0	1	0	1	0	1	0	1
1	1	1	1	24	1	0	0	1	0	1	1	0
0	0	1	0	35	1	0	0	1	1	1	1	0
0	0	1	0	55	0	1	0	0	0	1	1	1
1	1	1	1	40	0	0	0	1	0	0	0	1
1	1	1	1	74	0	0	0	0	0	1	0	1
0	0	1	0	88	0	1	0	1	0	0	1	0
1	1	1	1	39	0	0	0	0	0	1	0	1
1	1	1	1	66	1	0	0	1	0	1	1	1
0	0	1	0	17	0	0	0	1	0	0	1	1
0	0	1	0	70	1	0	0	0	0	1	0	1
1	1	1	1	60	0	1	0	1	0	1	1	1
1	1	1	1	23	0	0	0	1	0	1	1	1
0	0	1	0	23	0	0	0	1	0	0	0	1
1	1	1	1	24	1	0	0	1	0	0	1	1
0	0	0	0	91	0	1	0	1	0	0	1	1
1	1	1	1	61	0	0	0	1	0	1	0	1
0	0	0	0	16	1	0	0	0	0	1	0	1
1	1	1	1	47	1	0	0	0	0	1	1	1
0	0	0	0	54	1	0	0	1	0	1	1	1
1	1	1	1	119	1	0	0	1	0	1	1	1
1	1	1	1	28	0	0	0	0	0	0	0	1
1	1	1	1	69	1	0	0	0	0	1	1	1
0	0	0	0	82	1	0	0	1	0	1	1	0
1	1	1	1	18	0	0	0	1	0	0	0	1
0	0	0	0	85	1	0	0	1	0	1	1	1
1	1	1	1	20	0	0	0	1	0	0	1	1
1	1	1	1	33	1	0	0	0	0	1	0	1
0	0	0	0	25	1	0	0	0	1	1	0	1
1	1	1	1	63	0	1	0	1	1	1	1	1
1	1	1	1	14	1	0	0	1	1	1	0	1
1	1	1	1	39	0	0	0	0	1	1	0	1
0	0	0	0	11	0	0	0	1	1	1	0	0
0	0	0	0	83	1	0	0	1	0	1	0	1
0	0	0	0	52	1	0	0	1	0	1	0	1
1	1	1	1	71	1	0	0	0	0	1	0	1
1	1	1	1	19	1	0	0	0	0	1	0	1
1	1	1	1	67	1	0	0	1	0	1	0	1
0	0	0	0	36	0	0	0	0	0	1	0	1
1	1	1	1	48	1	0	0	0	1	1	1	1
1	1	1	1	38	0	0	0	1	1	1	1	1
1	1	1	1	42	1	0	0	1	0	1	1	1
1	1	1	1	103	0	1	0	1	1	0	1	1
1	1	1	1	34	0	0	0	1	0	1	1	1
0	0	0	0	62	1	0	0	1	0	1	1	1
1	1	1	1	22	0	0	0	1	0	0	1	1
0	0	0	0	38	1	0	0	1	1	1	0	1
1	1	1	1	84	1	0	0	0	1	1	0	1
1	1	1	0	7	1	0	0	0	1	1	0	0
1	1	1	0	62	1	0	0	1	1	1	1	1
0	0	0	0	71	0	1	0	1	0	0	1	1
1	1	1	1	71	0	0	0	1	0	1	1	1
1	1	1	1	47	1	0	0	1	1	1	0	1
0	0	0	0	11	0	0	0	1	0	0	1	1
0	0	0	0	31	0	1	0	1	0	0	0	1
1	1	1	1	92	1	0	0	1	0	1	1	1
1	1	1	1	64	0	0	0	1	0	1	0	0
1	1	1	1	35	1	0	0	1	0	1	1	1
1	1	1	0	58	1	0	0	1	0	0	1	0
1	1	1	0	59	1	0	0	1	0	1	1	1
1	1	1	0	293	0	0	0	1	1	1	0	0
0	0	0	0	55	1	0	0	0	0	1	0	1
0	0	0	0	70	1	0	0	0	0	1	1	1
1	1	1	0	73	0	0	0	1	0	0	1	1
1	1	1	0	24	0	0	0	0	0	1	0	1
0	0	0	0	29	1	0	0	0	0	1	0	1
0	0	0	0	51	0	0	0	1	0	0	0	1
1	1	1	0	44	0	0	0	1	0	1	1	1
1	1	1	0	24	1	0	0	0	0	1	0	1
0	0	0	0	24	1	0	0	1	0	0	1	1
0	0	0	0	16	0	0	0	1	0	0	0	1
1	1	1	0	24	1	0	0	1	0	0	1	1
1	1	1	0	6	0	0	0	1	1	0	1	0
1	1	1	0	5	0	0	0	0	0	0	0	0
0	0	0	0	137	0	0	1	0	1	0	0	0
1	1	1	0	113	1	0	0	0	1	1	1	0
1	1	1	0	111	1	0	1	0	1	0	0	0
0	0	0	0	12	0	0	0	0	0	1	1	1
1	1	1	0	6	0	0	0	1	0	0	0	0
0	0	0	0	30	1	0	0	0	0	1	1	1
0	0	0	0	10	0	0	0	0	0	1	1	0
1	1	1	0	4	0	0	0	1	0	0	0	0
1	1	1	0	49	1	0	0	1	0	1	1	0
0	0	0	0	48	1	0	0	1	1	1	1	0
1	1	1	0	12	0	0	0	0	0	0	1	1
1	1	1	0	7	0	0	0	1	1	1	1	1
1	1	1	0	15	1	0	0	0	0	1	0	0
1	1	1	0	22	1	0	0	1	0	1	1	0
0	1	1	0	19	0	0	0	0	0	1	0	0
0	1	1	0	9	0	0	0	1	0	0	1	1
0	0	0	0	7	0	0	0	0	0	0	1	0
0	1	1	0	22	1	0	0	0	0	1	1	0
0	1	1	0	20	0	1	0	0	0	1	1	1
0	0	0	0	15	1	0	0	0	0	1	1	0
0	0	0	0	126	0	0	1	0	0	0	0	0
0	0	0	0	12	0	0	0	0	0	0	1	0
0	0	0	0	10	0	0	0	0	0	0	1	0
0	1	1	0	5	1	0	0	0	0	1	0	0
0	1	1	0	81	1	0	0	0	1	0	0	0
0	0	0	0	28	0	1	0	1	0	1	1	0
0	0	0	0	28	0	1	0	1	0	1	0	0
0	1	1	0	5	1	0	0	0	0	0	0	1
0	0	0	0	30	0	0	0	0	0	1	0	0
0	1	1	0	8	1	0	0	1	0	1	0	0
0	1	1	0	9	0	1	0	0	0	0	0	0
0	0	0	0	18	0	0	0	0	0	1	0	0
0	1	1	0	21	1	0	0	0	0	1	1	0
0	1	1	0	93	0	1	0	0	0	1	1	0
0	0	0	0	18	0	0	0	0	0	0	0	0
0	1	1	0	15	1	0	0	0	0	1	1	0
0	0	0	0	5	0	0	0	0	0	0	0	0
0	1	1	0	18	0	0	0	0	0	1	1	1
0	1	1	0	12	0	0	0	1	0	0	1	0
0	1	1	0	26	1	0	0	1	0	1	1	0
0	1	1	0	8	1	0	0	1	0	1	0	0
0	1	1	0	23	0	1	0	0	0	1	1	0
0	1	1	0	6	0	0	0	0	0	0	0	0
0	0	0	0	16	1	0	0	0	0	1	0	0
0	1	1	0	21	1	0	0	1	0	1	0	0
0	1	1	0	10	0	0	0	0	0	1	0	0
0	0	0	0	13	0	0	0	0	0	1	0	1
0	0	0	0	8	1	0	0	0	0	1	1	0

## Sheet: Cytokine
Non-MDR-ABC					MDR-ABC					Controls
IL-2	IL-4	IL-6	IL-10		IL-2	IL-4	IL-6	IL-10		IL-2	IL-4	IL-6	IL-10
1	1.3	39.2	42.1		2.3	1.5	30.3	8.7		1.2	0.7	2.3	2.6
2.5	0.6	128.8	21.9		2.3	2.6	17.4	14.1		3	2.2	3.3	3.6
2.7	0.8	676.3	148		2.1	1.5	3.3	11.8		1.4	0.9	6.3	2.1
2.8	0.7	171.1	13.6		2	0.9	59.1	14.1		1.9	2.4	8.7	3.4
3	2.4	1223.1	28.5		2.7	2.2	6.9	7.6		1.5	1.4	1.9	2.6
1.9	2.3	2.7	21		1.4	0.9	71.4	8.9		2	0.9	12.1	3.7
1.4	1.4	18.9	26.5		1.7	0.9	35.4	55.8		2.4	2.3	3.5	4.3
1.7	1.6	12.8	41.3		2.1	0.9	35.4	55.8		2.1	2	2.3	3.3
1.2	1.9	4.2	2.1		2.2	2.2	5.1	6.6		3.4	1.6	10.5	3.9
1.5	3.5	30	3.6		1	1.4	31.5	8.3		1.2	0.9	6.1	2.6
2.9	3.4	17.4	10.9		1.7	1.2	32.4	4.7		8.9	2.2	2.4	2.7
3.8	2.3	200.2	6.7		1.5	2.6	83.9	47.5		1.6	0.9	3.7	3.6
5.2	1.7	22.8	7.1		2.5	1.8	128.8	36		2.9	3	8.1	3.4
3.7	1.6	69.7	5.5		1.4	2	4.8	4.9		1.7	1.4	7.9	2.6
2.6	4.3	985.6	7.1		1	1.5	4.1	2.6		1.7	1.8	6.2	3.6
2.4	3.8	4.3	4.1		3.2	3.2	47.7	4.9		1.9	2.5	5.1	4
6	3.5	140.3	7.4		3	3.7	2	3.2		2.1	2.3	2.5	4.5
4.8	2.8	369.9	120.4		2.7	3.3	16.2	11.1		2.9	2.2	2.4	4.3
2.2	2.9	127.3	7.7		3.4	3.1	129.8	11.2		2.5	2.1	2.2	2.9
1.7	2.6	1898.5	40.3		3.4	2.7	34.3	64.6		2.5	2.1	2.2	2.9
1.9	3.9	1.8	3		1	3.1	6.8	4.9		3.3	2.2	4.1	4.5
3.6	2.3	233.1	5.1		2.7	3.3	9.4	10.6		2.3	1.9	6.5	3.9
4	4.4	3.5	6.5		3.4	2.9	7.4	18.8		2.1	2.3	4.8	3.4
5.2	4	21	3.1		5.7	4.3	34.6	8.6		1.7	1.7	2.4	4.3
4.1	3.6	163.7	27.3		4.8	3.3	27	3.2		2.7	2.6	11.2	4.4
6.2	2.6	4035.5	152.9		2.3	63.8	18.4	2.8		2.2	2.1	8.2	2.8
5.9	3.8	41	5.3		5.8	3.3	38.4	27.3		2.6	1.4	3	3.8
3.4	2.9	5.2	3.9		4.6	4	52.5	25		2.3	2.4	2.4	2.6
2.9	3.6	26.1	2.8		4.2	3.5	18.8	52.2		1.9	1.2	2.4	4.9
2.5	3.5	91.6	10.2		3.5	3.6	37.8	3.5		1.7	2.3	4.7	4.1
2.9	3.4	63.4	48.1		3	4.1	20.3	3.7		2.5	3	2	3
1.9	3.8	4.4	3.5		2.9	4.5	12.7	4		2.1	2.3	6.7	4.4
7.7	6.3	1312.3	53.7		4.1	3.7	30.2	5.8		1.5	1.5	5.2	3.2
3.8	3.1	291.9	53.2		1.5	2.7	7.7	5.2		1.9	1.9	2.3	3.5
4.6	4.9	845.8	64.2		3.7	3.2	46	4		1.3	1.5	7.1	3.3
5.4	14.4	624.3	14.9		2.4	2.8	6.5	3.2		2.1	1	3.6	3.6
1.3	1.9	9.5	4		2.8	2.7	27	1.6		1.1	0.8	3.9	2.6
					3.6	3.1	51.6	5.1		3.4	2.1	4.4	3.7
					5.1	4.3	44.8	90.5		2.6	2.3	4	4.2
					3.8	4.9	8.4	8.7		2.4	2.8	3.8	4
					3.7	3.4	50.7	13.6		2.6	2.6	6.2	2.8
					3.5	4	119	112.6		1.5	1.8	2.8	3
										2.4	2.3	2.3	4.3
										1.5	2	4	2.6
										2.6	1.9	3.2	4.8
										1.8	1.2	1.8	3.6
										2.8	2.6	2.9	3.6
										2	2.2	3.1	4.5
										3.1	2.9	6.4	4.5
										8.9	2.2	2.4	2.7
